# Supplementary material for: RGS5 augments astrocyte activation and facilitates neuroinflammation via TNF signaling
Source: PubMed Central journal article supplement (PMC10481574; doi:10.1186/s12974-023-02884-w), 2023-09-06
Supplement: 12974_2023_2884_MOESM1_ESM.pdf [file 12974_2023_2884_MOESM1_ESM.pdf]

Figure S1

A

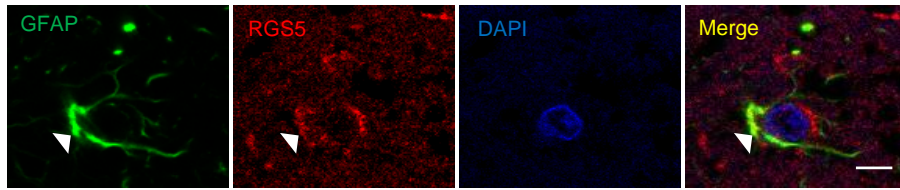

B

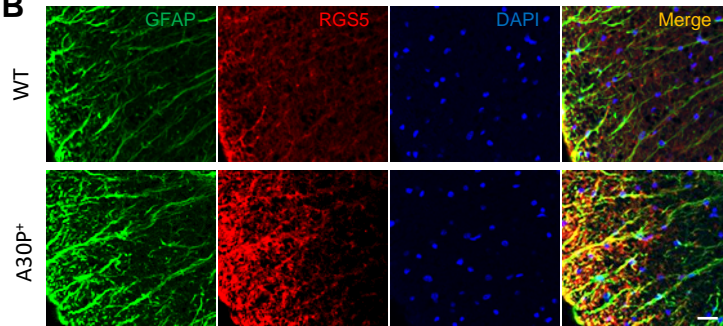

C

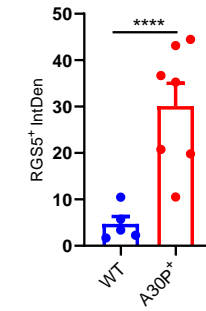

D

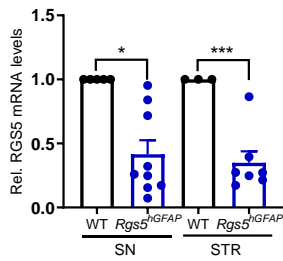

E

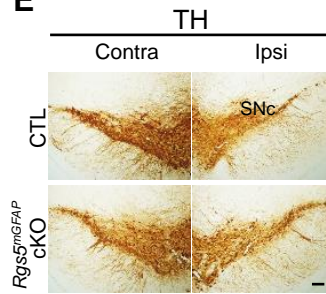

F

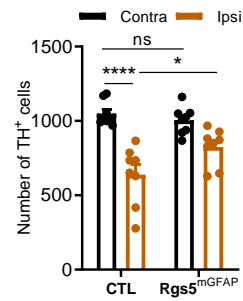

G

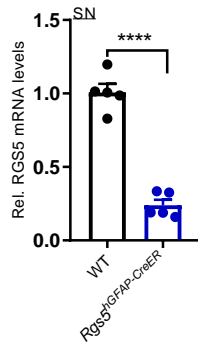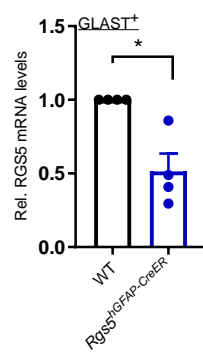

H

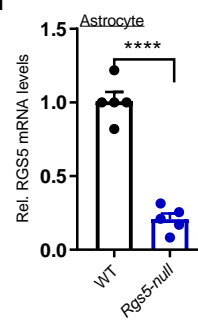

**Figure S1. Selective ablation of *Rgs5* in astrocytes inhibits LPS-induced inflammation *in vivo*.**

- (A) Double immunofluorescence staining for GFAP and RGS5 on the SN. Arrowheads indicate the double-labeled cells. Scale bar, 10  $\mu\text{m}$ .
- (B) Double immunofluorescence staining for GFAP and RGS5 on the spinal cord of A30P-mutant  $\alpha$ -synuclein transgenic mice or littermate control.
- (C) Quantification of immunofluorescence integrated density for RGS5 shown in (B). Scale bar, 10  $\mu\text{m}$ .
- (D) Representative graph showing a reduction in *Rgs5* mRNA expression in the SN and STR of *Rgs5<sup>hGFAP</sup>* cKO mice.  $n = 3 - 9$ .
- (E) Immunohistochemical staining of TH on the ventral mesencephalon of adult *Rgs5<sup>mGFAP</sup>* cKO and their littermate controls administered with a single intra-nigral injection of LPS. Scale bar, 100  $\mu\text{m}$ .
- (F) Quantitative data of TH<sup>+</sup> cell numbers shown in (E) ( $n = 8$ ).
- (G) Representative graph showing a reduction in *Rgs5* mRNA expression in the SN or GLAST<sup>+</sup> astrocytes of *Rgs5<sup>hGFAP-CreER</sup>* cKO mice (2-month-old). *Rgs5<sup>hGFAP-CreER</sup>* cKO mice were administered with tamoxifen (i.p.) and sacrificed 3 week post injection.  $n = 4-5$ .
- (H) Representative graph showing a reduction in *Rgs5* mRNA expression in *Rgs5<sup>mGFAP</sup>* cKO astrocytes (*RGS5*-null).  $n = 5$ .

Data are expressed as mean  $\pm$  SEM. \* $P < 0.05$ ; \*\* $P < 0.01$ ; \*\*\* $P < 0.001$ ; \*\*\*\* $P < 0.0001$ .

Figure S2

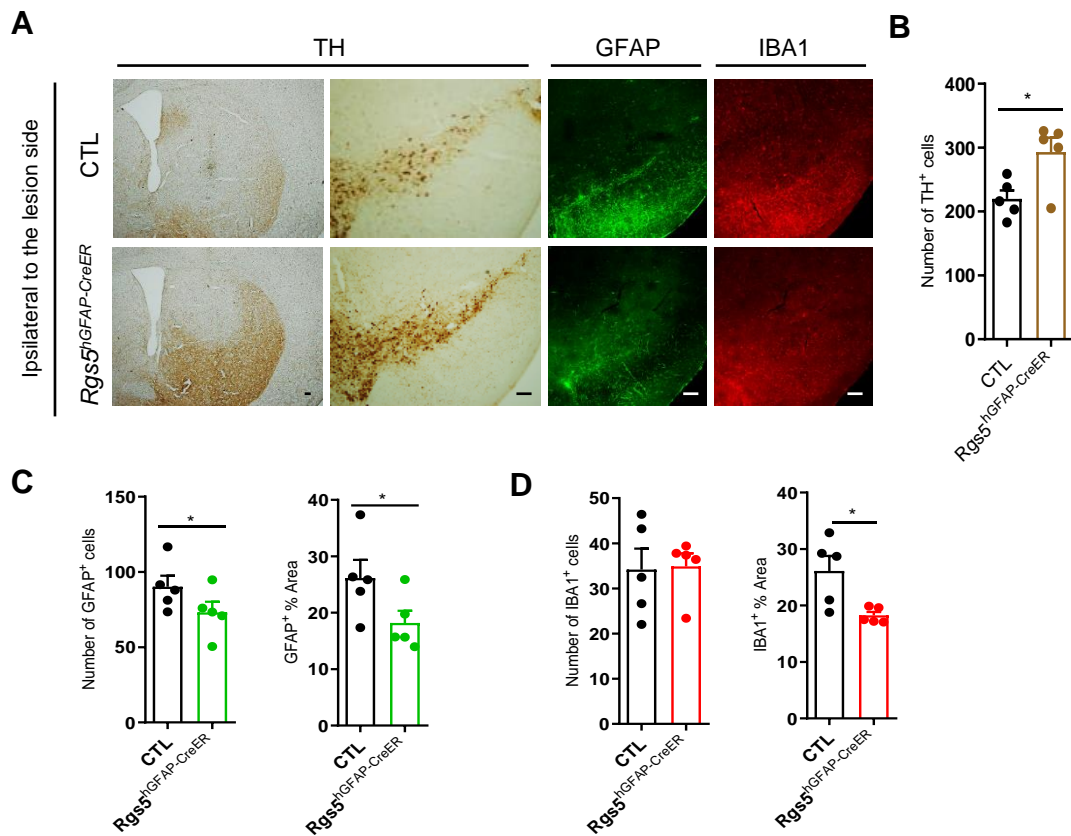

**Figure S2. Selective ablation of *Rgs5* in astrocytes inhibits 6-OHDA-induced DA neuron loss and glial activation in the SN.**

(A) Immunohistochemical staining for TH, GFAP and IBA1 on the striatum or ventral mesencephalon of adult *Rgs5<sup>hGFAP-CreER</sup>* cKO and their littermate controls received a single striatal injection of 6-OHDA (4  $\mu$ g). Scale bars, 100  $\mu$ m.

(B) Quantification of TH positive cells shown in (A),  $n = 5$ .

(C, D) Quantification of immunoreactive cells or immunoreactivity for GFAP (C) or IBA1 (D) shown in (A).  $n = 5$ . Data are expressed as mean  $\pm$  SEM, two-tailed  $t$ -test. \* $P < 0.05$ .

Figure S3

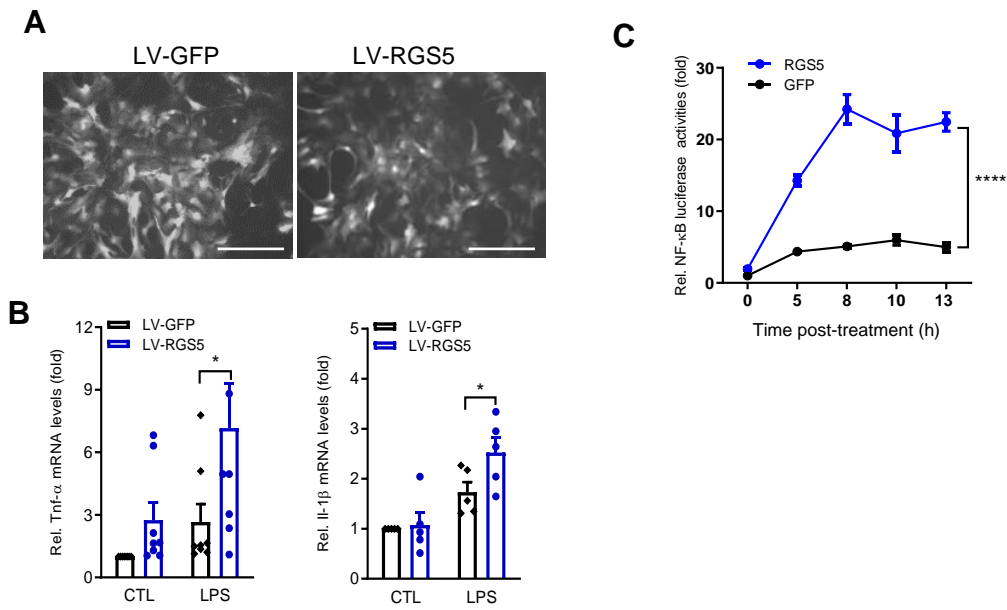

**Figure S3. Increased production of pro-inflammatory mediators induced by *Rgs5* overexpression *in vitro*.**

(A) Representative fluorescent microphotographs of rat primary cultured astrocytes transfected with either Lenti-RGS5-HA-FLAG-2A-GFP (LV-RGS5) driven by CMV promoter or Lenti-control vector (LV-GFP) for 12 h and followed by treatment with LPS or vehicle. Cells were harvested 48 h later. Scale bars, 100  $\mu$ m.

(B) Representative graphs showing relative mRNA levels of indicated pro-inflammatory mediators in the transfected astrocytes with or without LPS challenge (500 ng/ml, 5 h).  $n = 4 - 8$  per group.

(C) NF- $\kappa$ B luciferase reporter assay in HEK293T cells co-expressing the NF- $\kappa$ B-Luc reporter and RGS5 or GFP shows the NF- $\kappa$ B luciferase reporter activities in cells incubated with TNF- $\alpha$  (20 ng/ml). The assay was performed in triplicates for 3 times. Data are expressed as mean  $\pm$  SEM. Two-way ANOVA. \* $P < 0.05$ ; \*\*\*\* $P < 0.0001$ .

## Figure S4

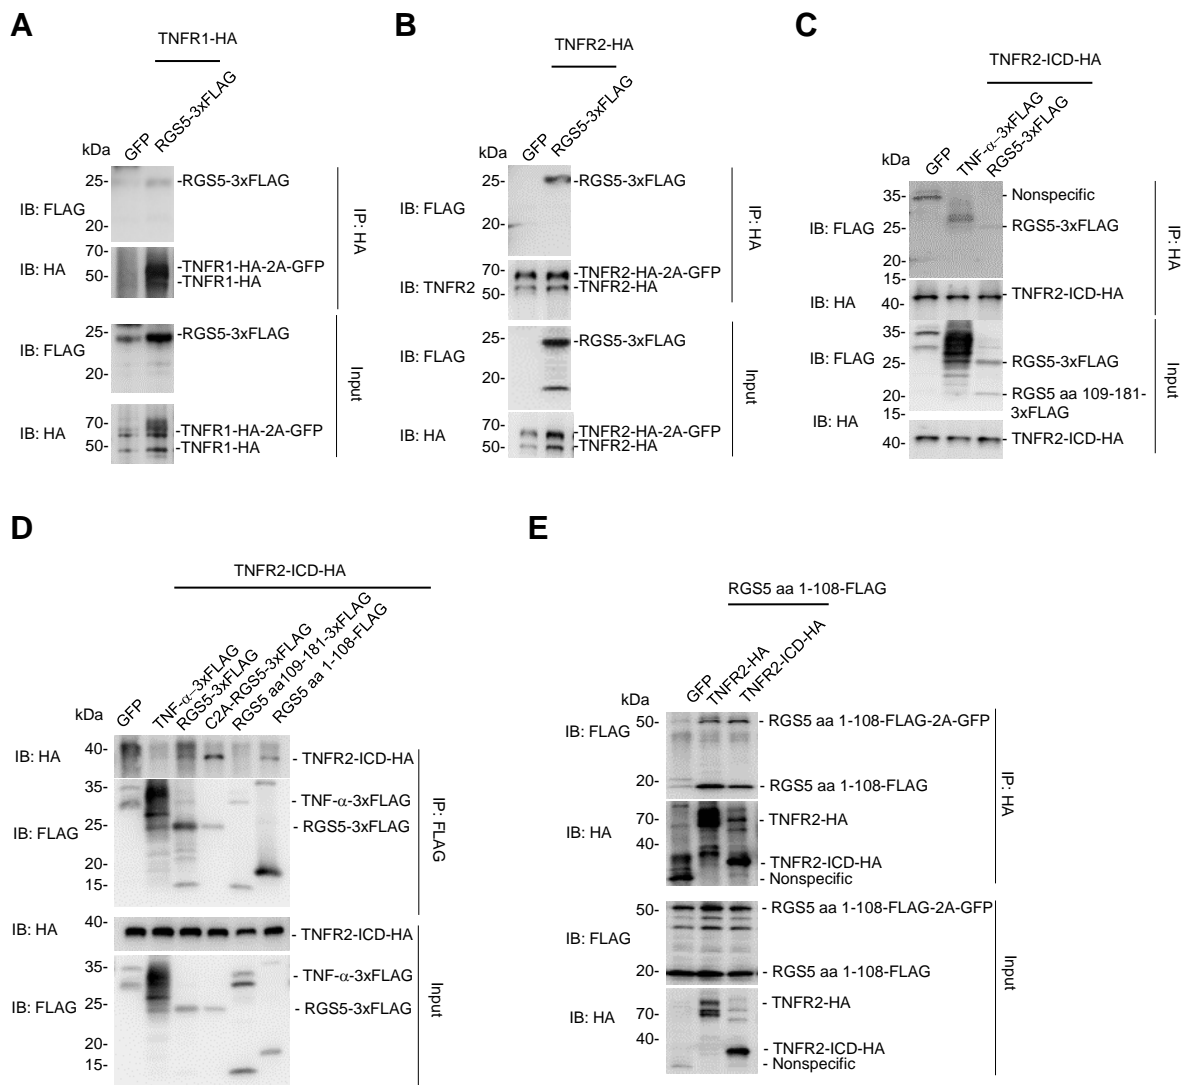

**Figure S4. RGS5 interacts with TNFR1, TNFR2 or TNFR2-ICD, respectively.**

(A, B) Co-immunoprecipitation assay reveals that RGS5 interacts with TNFR1 and TNFR2. HEK293T cells were transiently transfected with HA-tagged TNFR1 or TNFR2 and empty vector (GFP), mouse TNF- $\alpha$ -3xFLAG or RGS5-3xFLAG. The assay was repeated at least three times. IB, immunoblot; IP, immunoprecipitation.

(C-E) Co-immunoprecipitation assays show the interaction between RGS5 truncation mutants and the intracellular domain (ICD) of TNFR2. C2A-RGS5 refers to the cysteine-2-alanine mutant of RGS5 which slows down the degradation of the protein. RGS5 aa 1-108, but not RGS5 aa 109-181, interacts with TNFR2-ICD.

Figure S5

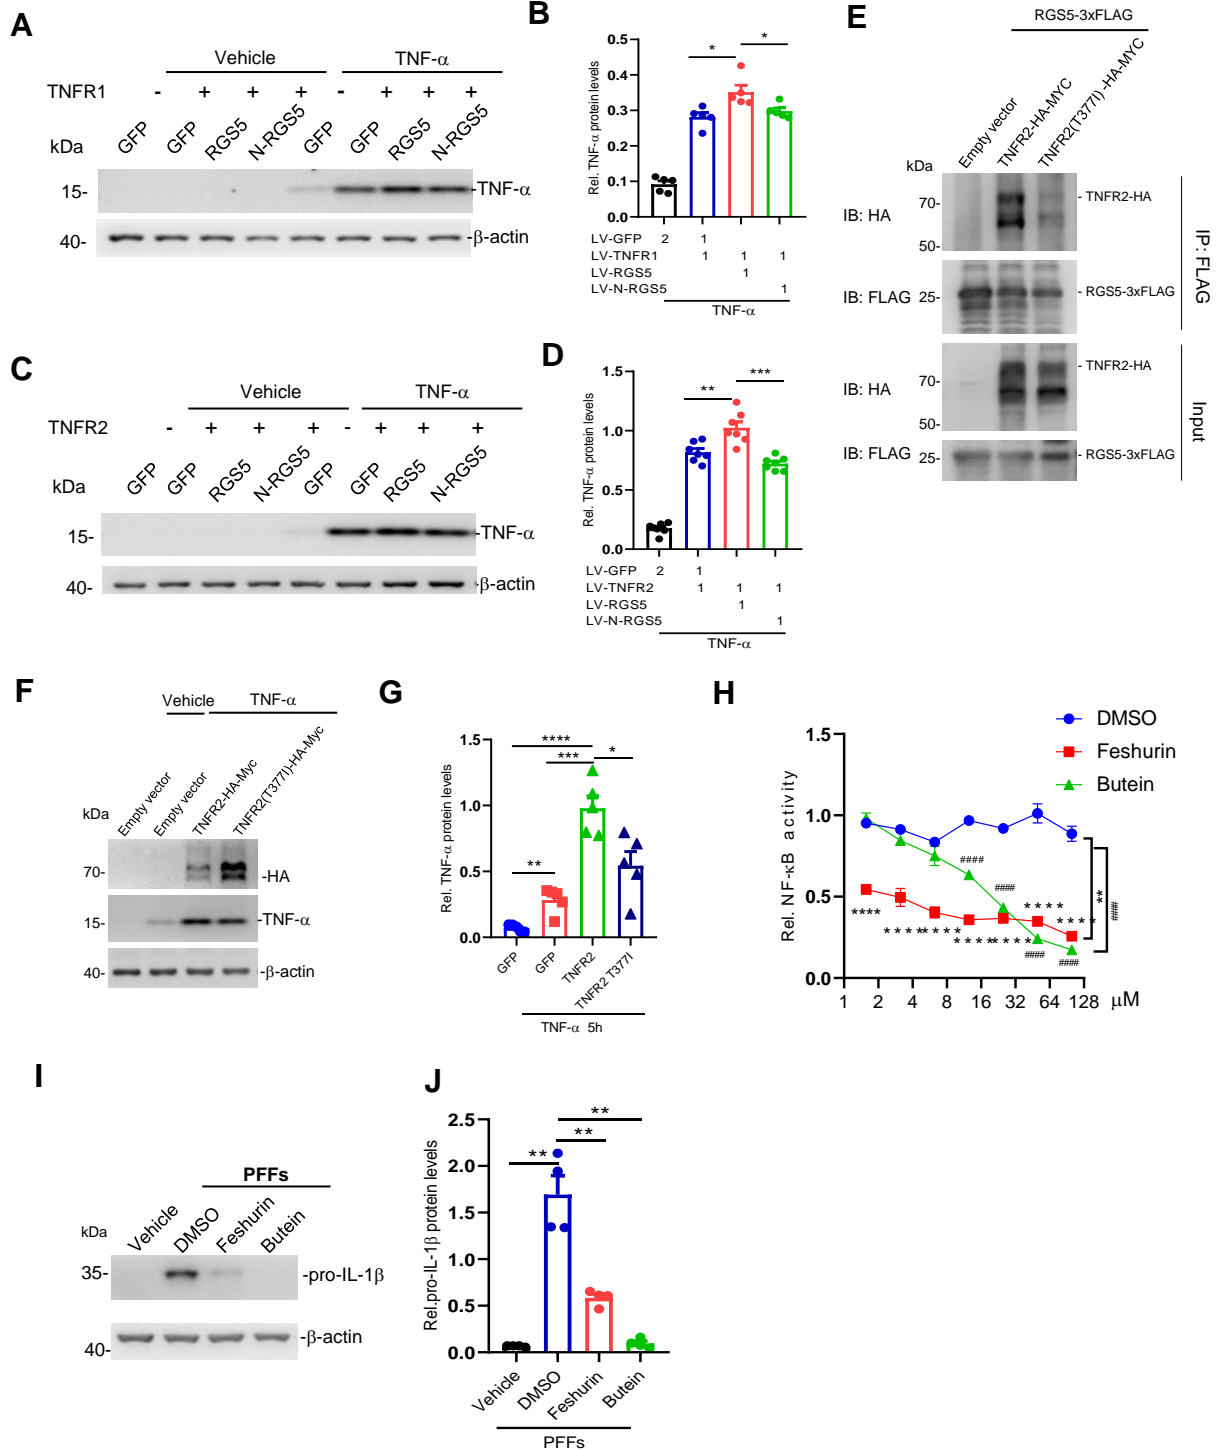

**Figure S5. Interrupting RGS5-TNFR interaction suppresses astrocytic TNF- $\alpha$  production.**

(A-D) Representative Western blots showing N-RGS5-induced attenuation of increased TNF- $\alpha$  expression in primary astrocytes following co-overexpression of RGS5 with TNFR1 (A and B) or TNFR2 (C and D). Primary astrocytes were transfected with lentivirus ( $\sim 10^6$  infectious units per ml) followed by challenge with TNF- $\alpha$  (100 ng/ml). ( $n = 5$ ).

(E) Identification of RGS5 fragments that interact with TNFR2 or TNFR2(T377I). Experiments are repeated 4 times.

(F) Reduced TNF- $\alpha$  expression in astrocytes transfected with TNFR2(T377I) compared to WT TNFR2 exposed to LPS.

(G) Quantification of data shown in (F) ( $n = 5$ ).

(H) NF- $\kappa$ B luciferase reporter activities in HEK293T cells. Cells were pre-incubated with feshurin or butein for 2 h at indicated concentrations and challenged with TNF- $\alpha$  (20 ng/ml, 4h). # indicates comparisons between DMSO and Butein groups; \* indicates comparisons between DMSO and feshurin groups.

(I, J) Reduced pro-IL-1 $\beta$  expression in astrocytes pre-incubated with feshurin or butein (50  $\mu$ M) for 2 h and then challenged with PFFs (2  $\mu$ g/ml, 4 h) ( $n = 4$ ).

Data are expressed as mean  $\pm$  SEM, two-way ANOVA followed with Bonferroni's multiple comparisons test or two-tailed  $t$ - test. \* $P < 0.05$ ; \*\* $P < 0.01$ ; \*\*\* $P < 0.001$ ; \*\*\*\* $P < 0.0001$ .
